# Supplementary material
Source: PubMed Central journal article supplement (PMC6614555)
Supplement: NIHMS1005437-supplement-Table_3.pdf [file NIHMS1005437-supplement-Table_3.pdf]

## Supplementary Material

**Table 3: Schedule of Visits and Evaluations for the VOICE Study**

|                                            | SCR 1                       | SCR 2 | ENR   | MLY                                                 | QRT | SEM | ANN | PUEV             | TERM |
|--------------------------------------------|-----------------------------|-------|-------|-----------------------------------------------------|-----|-----|-----|------------------|------|
|                                            | Up to and including 56 days |       | Day 0 | Must occur -14 days or + 13 days of scheduled visit |     |     |     | Specified in SSP |      |
| Informed Consent                           | X                           |       | X     |                                                     |     |     |     |                  |      |
| Demographics                               | X                           |       |       |                                                     |     |     |     |                  |      |
| Locator Information/<br>Reimbursement      | X                           | X     | X     | X                                                   | X   | X   | X   | X                | X    |
| Behavioral Eligibility                     | X                           | X     | X     |                                                     |     |     |     |                  |      |
| Review Screen<br>Documentation             |                             |       | X     |                                                     |     |     |     |                  |      |
| Behavioral Risk Assessment                 |                             |       | X     | X                                                   | X   | X   | X   | X                | X    |
| Adherence Assessment                       |                             |       |       | X                                                   | X   | X   | X   | X                |      |
| Prod. Sharing/Dose Recall                  |                             |       |       |                                                     | X   | X   | X   | X                |      |
| Intravaginal Practices<br>Assess.          |                             |       |       |                                                     |     |     | X   | X                | X    |
| Social Harms Assessment                    |                             |       |       |                                                     | X   | X   | X   | X                | X    |
| Schedule Next Visit                        | ▲                           | ▲     | ▲     | X                                                   | X   | X   | X   | X                | ▲    |
| Test Results                               | X                           | X     | X     | X                                                   | X   | X   | X   | X                | X    |
| Randomization                              |                             |       | X     |                                                     |     |     |     |                  |      |
| HIV Pre/Post-Test Couns.                   | X                           | ▲     | X     | X                                                   | X   | X   | X   | X                | X    |
| Condoms, HIV/STI Risk<br>Red. Couns.       | X                           | X     | X     | X                                                   | X   | X   | X   | X                | X    |
| STI/UTI Treatment                          | ▲                           | ▲     | ▲     | ▲                                                   | ▲   | ▲   | ▲   | ▲                | ▲    |
| Offer HIV Test/Couns.<br>Partners          | X                           | X     | X     | X                                                   | X   | X   | X   | X                | X    |
| Offer STI Couns./Tx.<br>Partners           | ▲                           | ▲     | ▲     | ▲                                                   | ▲   | ▲   | ▲   | ▲                | ▲    |
| Contraceptive and<br>contraception Couns.  | X                           | X     | X     | X                                                   | X   | X   | X   | X                | X    |
| Medical Eligibility                        | X                           |       | X     |                                                     |     |     |     |                  |      |
| Med./Mens. History/ Current<br>Medications |                             | X     | X     | X                                                   | X   | X   | X   | X                | X    |
| Weight                                     | X                           | X     |       | ■                                                   | X   | X   | X   | X                | ▲    |
